# Supplementary material for: Computational Analysis of nsSNPs of ADA Gene in Severe Combined Immunodeficiency Using Molecular Modeling and Dynamics Simulation
Source: PubMed Central journal article supplement (PMC6875294; doi:10.1155/2019/5902391), 2019-11-03
Supplement: 5902391.f1.pdf [file 5902391.f1.pdf]

## Supplementary Materials

Table 1: Results of prediction of 278 nsSNPs in human ADA gene using 11 different computational algorithms.

| Id                 | mutation     | SIFT     | PolyPhen  | FATHMM   | LRT      | M-CAP    | MetaLR   | MetaSVM  | MutationAssessor | MutationTaster | PROVEAN  | fathmm-MKL_coding |
|--------------------|--------------|----------|-----------|----------|----------|----------|----------|----------|------------------|----------------|----------|-------------------|
| rs1170608999       | A359T        | T        | B         | D        | N        | D        | D        | T        | M                | N              | N        | N                 |
| rs749295575        | A357G        | D        | B         | D        | N        | D        | D        | D        | L                | N              | N        | N                 |
| rs1313508972       | P355T        | T        | B         | D        | N        | D        | D        | T        | L                | N              | N        | N                 |
| rs1398663736       | A350S        | T        | B         | D        | D        | D        | D        | D        | M                | D              | N        | D                 |
| rs1327379655       | Y348C        | T        | PD        | D        | N        | D        | D        | D        | M                | D              | D        | D                 |
| rs1042207236       | Y348H        | T        | B         | D        | N        | D        | D        | D        | L                | D              | N        | D                 |
| rs902376256        | L346M        | T        | B         | D        | N        | D        | D        | D        | L                | N, D           | N        | N                 |
| rs925706516        | D345E        | T        | B         | D        | N        | D        | D        | T        | N                | N              | N        | N                 |
| rs779530705        | D345Y        | T        | B         | D        | N        | D        | D        | T        | L                | N              | N        | N                 |
| rs779530705        | D345N        | T        | B         | D        | N        | D        | D        | T        | N                | N              | N        | N                 |
| rs775670821        | L343P        | D        | PD        | D        | D        | D        | D        | D        | H                | D              | D        | D                 |
| rs1170562212       | L343V        | D        | PSD       | D        | D        | D        | D        | D        | M                | D              | N        | D                 |
| rs1284644841       | R341M        | D        | B         | D        | N        | D        | D        | T        | L                | N              | N        | N                 |
| <b>rs769504452</b> | <b>K340E</b> | <b>D</b> | <b>PD</b> | <b>D</b> | <b>D</b> | <b>D</b> | <b>D</b> | <b>D</b> | <b>H</b>         | <b>D</b>       | <b>D</b> | <b>D</b>          |
| rs1379818118       | E339G        | D        | PD        | D        | D        | D        | D        | D        | H                | D              | D        | D                 |
| rs867629356        | D338N        | T        | B         | D        | N        | D        | D        | T        | L                | N              | N        | N                 |
| rs1262270901       | E337G        | D        | PD        | D        | D        | D        | D        | D        | M                | D              | D        | D                 |
| rs1156976510       | E337K        | D        | B         | D        | N        | D        | D        | D        | M                | D              | D        | D                 |
| rs1196432166       | P336Q        | D        | PD        | D        | D        | D        | D        | D        | H                | D              | D        | D                 |
| rs765787795        | P336S        | T        | PD        | D        | D        | D        | D        | D        | L                | D              | D        | D                 |
| rs766550065        | S333G        | T        | PD        | D        | D        | D        | D        | D        | M                | D              | D        | D                 |
| rs372131830        | K331T        | D        | B         | D        | N        | D        | D        | D        | M                | D              | D        | D                 |
| rs759355046        | A330V        | D        | PD        | D        | D        | D        | D        | D        | M                | D              | D        | D                 |
| rs866477587        | A330T        | D        | PD        | D        | D        | D        | D        | D        | H                | D              | D        | D                 |
| rs121908715        | A329V        | D        | PD        | D        | D        | D        | D        | D        | H                | A              | D        | D                 |
| rs756329749        | N328K        | D        | PD        | D        | D        | D        | D        | D        | M                | D              | D        | N                 |
| rs778031507        | N328S        | D        | PD        | D        | D        | D        | D        | D        | M                | D              | D        | D                 |
| rs551832248        | N328H        | D        | PD        | D        | D        | D        | D        | D        | M                | D              | D        | D                 |
| rs1308151960       | I327V        | D        | PD        | D        | D        | D        | D        | D        | L                | D              | N        | D                 |
| rs754097992        | R324K        | T        | B         | D        | D        | D        | D        | D        | L                | D              | N        | D                 |
| rs757380249        | F322L        | T        | B         | D        | D        | D        | D        | T        | L                | D              | N        | D                 |
| rs765373813        | E320K        | T        | B         | D        | D        | D        | D        | D        | L                | D              | N        | D                 |
| rs1208384344       | T318S        | T        | B         | D        | D        | D        | D        | D        | L                | D              | N        | D                 |
| rs1319693020       | G316S        | D        | PD        | D        | D        | D        | D        | D        | M                | D              | D        | D                 |
| rs889823379        | M315I        | T        | B         | D        | D        | D        | D        | D        | M                | D              | N        | D                 |
| rs758501653        | M315T        | D        | PD        | D        | D        | D        | D        | D        | M                | D              | D        | D                 |

|                     |              |          |           |          |          |          |          |          |          |          |          |          |
|---------------------|--------------|----------|-----------|----------|----------|----------|----------|----------|----------|----------|----------|----------|
| rs547569818         | D314G        | T        | B         | D        | N        | D        | D        | T        | N        | N, D     | N        | D        |
| rs923650787         | D314Y        | T        | B         | D        | N        | D        | D        | T        | N        | N        | N        | N        |
| rs747500864         | R313Q        | T        | B         | D        | N        | D        | T        | T        | N        | N        | N        | N        |
| rs79249850          | R313W        | D        | PD        | D        | N        | D        | D        | D        | M        | N        | D        | N        |
| rs748974674         | K312R        | T        | B         | D        | N        | D        | D        | T        | L        | N        | N        | D        |
| rs530131290         | K312Q        | T        | B         | D        | N        | D        | D        | T        | L        | N        | N        | D        |
| rs773914135         | T311I        | T        | B         | D        | N        | D        | D        | T        | N        | N        | N        | D        |
| rs145924854         | M310I        | T        | B         | D        | N        | T        | T        | T        | N        | N        | N        | D        |
| rs1309102513        | D305N        | T        | B         | D        | N        | D        | D        | T        | N        | D        | N        | D        |
| rs199422327         | L304R        | D        | PD        | D        | D        | D        | D        | D        | H        | A        | D        | D        |
| rs1416109540        | K301R        | T        | B         | D        | D        | D        | D        | T        | N        | N, D     | N        | D        |
| rs760574070         | F300L        | T        | B         | D        | D        | D        | D        | D        | M        | D        | D        | D        |
| rs371305751         | F300C        | D        | PD        | D        | D        | D        | D        | D        | M        | D        | D        | D        |
| rs1337332565        | F300L        | T        | B         | D        | D        | D        | D        | D        | M        | D        | D        | D        |
| rs1208759543        | I299V        | T        | B         | D        | D        | D        | D        | T        | N        | D        | N        | D        |
| rs121908718         | P297L        | D        | PD        | D        | D        | D        | D        | D        | H        | D        | D        | D        |
| rs121908718         | P297Q        | D        | PD        | D        | D        | D        | D        | D        | H        | A        | D        | D        |
| rs765445980         | D296N        | D        | PD)       | D        | D        | D        | D        | D        | L        | D        | D        | D        |
| <b>rs121908721</b>  | <b>S291L</b> | <b>D</b> | <b>PD</b> | <b>D</b> | <b>D</b> | <b>D</b> | <b>D</b> | <b>D</b> | <b>H</b> | <b>D</b> | <b>D</b> | <b>D</b> |
| <b>rs121908721</b>  | <b>S291W</b> | <b>D</b> | <b>PD</b> | <b>D</b> | <b>D</b> | <b>D</b> | <b>D</b> | <b>D</b> | <b>H</b> | <b>D</b> | <b>D</b> | <b>D</b> |
| rs1350879122        | Y290C        | D        | B         | D        | D        | D        | D        | D        | L        | D        | D        | D        |
| rs1017199100        | N289T        | D        | PD        | D        | D        | D        | D        | D        | M        | D        | D        | D        |
| rs1464247052        | A288V        | T        | B         | D        | N        | D        | D        | T        | L        | D        | N        | D        |
| rs752147539         | D286E        | D        | PD        | D        | D        | D        | D        | D        | M        | D        | D        | D        |
| rs781702460         | N285Y        | D        | B         | D        | N        | D        | D        | D        | M        | N, D     | D        | D        |
| rs752935199         | L283F        | T        | B         | D        | N        | D        | T        | T        | N        | N, D     | N        | N        |
| rs751635016         | R282L        | D        | PD        | D        | D        | D        | D        | D        | L        | D        | D        | D        |
| rs751635016         | R282Q        | T        | B         | D        | D        | D        | D        | D        | N        | D        | N        | D        |
| rs542229902         | E277D        | T        | B         | D        | D        | D        | D        | T        | L        | N, D     | N        | D        |
| rs756480576         | T276M        | D        | B         | D        | N        | D        | D        | D        | M        | D        | N        | D        |
| rs1320463424        | T276P        | D        | B         | D        | N        | D        | D        | D        | M        | D        | D        | D        |
| rs778167423         | D275E        | T        | B         | D        | N        | T        | D        | T        | L        | N, D     | N        | N        |
| rs121908738         | P274L        | T        | B         | D        | D        | D        | D        | D        | L        | A        | D        | D        |
| rs1217198230        | A271V        | D        | PD        | D        | D        | D        | D        | D        | M        | D        | D        | D        |
| rs370450947         | Y267F        | T        | B         | D        | D        | D        | D        | D        | M        | D        | N        | D        |
| rs370450947         | Y267S        | D        | PD        | D        | N        | D        | D        | D        | M        | D        | D        | D        |
| rs781040248         | S265P        | D        | PD        | D        | D        | D        | D        | D        | H        | D        | D        | D        |
| <b>rs748088317</b>  | <b>C262Y</b> | <b>D</b> | <b>PD</b> | <b>D</b> | <b>D</b> | <b>D</b> | <b>D</b> | <b>D</b> | <b>H</b> | <b>D</b> | <b>D</b> | <b>D</b> |
| <b>rs1329183956</b> | <b>H258Y</b> | <b>D</b> | <b>PD</b> | <b>D</b> | <b>D</b> | <b>D</b> | <b>D</b> | <b>D</b> | <b>H</b> | <b>D</b> | <b>D</b> | <b>D</b> |
| rs1303099065        | M257I        | T        | B         | D        | D        | D        | T        | T        | N        | D        | N        | D        |
| rs145863450         | M257T        | D        | B         | D        | D        | D        | D        | D        | M        | D        | D        | D        |
| rs761098217         | E255D        | T        | B         | D        | N        | D        | D        | T        | L        | N        | N        | N        |
| rs148994526         | R253Q        | T        | B         | D        | N        | D        | D        | D        | M        | N        | N        | N        |
| rs201944717         | R253W        | D        | PD        | D        | N        | D        | D        | D        | M        | N, D     | D        | N        |
| rs762216021         | R251S        | T        | B         | D        | N        | D        | D        | D        | M        | D        | D        | D        |

|                    |              |          |           |          |          |          |          |          |          |          |          |          |
|--------------------|--------------|----------|-----------|----------|----------|----------|----------|----------|----------|----------|----------|----------|
| rs1254815787       | R251W        | D        | PD        | D        | N        | D        | D        | D        | L        | N        | D        | N        |
| rs76555325         | N250D        | T        | B         | D        | N        | T        | D        | T        | -        | N        | N        | N        |
| rs751244757        | Y249C        | D        | PD        | D        | D        | D        | D        | D        | -        | D        | D        | D        |
| rs754578956        | A247T        | T        | B         | D        | N        | D        | D        | T        | -        | N        | N        | N        |
| rs766952213        | D245Y        | D        | PD        | D        | D        | D        | D        | D        | -        | D        | D        | D        |
| rs766952213        | D245N        | D        | PD        | D        | D        | D        | D        | D        | -        | D        | D        | D        |
| rs1312320956       | G239D        | D        | PD        | D        | D        | D        | D        | D        | -        | D        | D        | D        |
| rs777820729        | G239S        | D        | PD        | D        | N        | D        | D        | D        | -        | D        | D        | D        |
| rs79281338         | R235L        | D        | PD        | D        | D        | D        | D        | D        | -        | D        | D        | D        |
| rs79281338         | R235Q        | D        | PD        | D        | D        | D        | D        | D        | -        | D        | D        | D        |
| rs778809577        | R235W        | D        | PD        | D        | D        | D        | D        | D        | -        | D        | D        | D        |
| rs121908729        | T233I        | D        | B         | D        | D        | D        | D        | D        | -        | A        | N        | D        |
| rs28930973         | T233I        | D        | B         | D        | D        | D        | D        | D        | -        | A        | N        | D        |
| rs772279816        | L231F        | D        | PD        | D        | D        | D        | D        | D        | -        | D        | D        | D        |
| rs775436011        | I230V        | T        | B         | D        | N        | D        | D        | T        | -        | N        | N        | N        |
| rs775436011        | I230L        | T        | B         | D        | N        | D        | T        | T        | -        | N        | N        | N        |
| rs747172905        | D229E        | T        | B         | D        | D        | D        | D        | T        | -        | N, D     | N        | N        |
| rs1347439202       | D229G        | D        | PD        | D        | D        | D        | D        | D        | -        | D        | D        | D        |
| rs768596356        | D229H        | D        | B         | D        | D        | D        | D        | D        | -        | D        | D        | D        |
| rs768596356        | D229N        | T        | B         | D        | D        | D        | D        | D        | -        | D        | N        | D        |
| rs1195013580       | V228G        | D        | PD        | D        | D        | D        | D        | D        | -        | D        | D        | D        |
| rs757210600        | V224I        | T        | B         | D        | D        | D        | D        | D        | N        | D        | N        | D        |
| rs371353841        | E222K        | T        | B         | D        | N        | D        | D        | T        | M        | N        | N        | N        |
| rs747167602        | S220L        | D        | B         | D        | N        | D        | D        | D        | L        | D, N     | D        | D        |
| rs768814204        | V218L        | T        | B         | D        | N        | D        | D        | D        | L        | D        | N        | D        |
| <b>rs121908723</b> | <b>G216R</b> | <b>D</b> | <b>PD</b> | <b>D</b> | <b>D</b> | <b>D</b> | <b>D</b> | <b>D</b> | <b>H</b> | <b>A</b> | <b>D</b> | <b>D</b> |
| rs114025668        | A215T        | D        | PD        | D        | D        | D        | D        | D        | H        | D        | D        | D        |
| rs375707215        | T212S        | D        | PD        | D        | D        | D        | D        | D        | H        | D        | D        | D        |
| rs121908716        | R211H        | D        | PD        | D        | D        | D        | D        | D        | H        | A        | D        | D        |
| rs121908740        | R211C        | D        | PD        | D        | D        | D        | D        | D        | M        | A        | D        | D        |
| rs753338833        | H210Y        | D        | PD        | D        | D        | D        | D        | D        | M        | D        | D        | D        |
| rs761846813        | G208S        | D        | PD        | D        | D        | D        | D        | D        | M        | D        | D        | D        |
| rs750364735        | K206N        | D        | PD        | D        | N        | D        | D        | D        | L        | D        | N        | N        |
| rs758254007        | E203D        | T        | B         | D        | D        | D        | D        | D        | M        | D        | N        | D        |
| rs200089190        | E203A        | D        | B         | D        | N        | D        | D        | D        | L        | D        | D        | D        |
| rs121908734        | Q199R        | T        | B         | D        | N        | D        | D        | T        | N        | N, D     | N        | D        |
| rs121908734        | Q199P        | D        | B         | D        | N        | D        | D        | T        | N        | N, D     | N        | D        |
| rs142456343        | H197Q        | D        | PD        | D        | D        | D        | D        | D        | H        | D        | D        | N        |
| rs762955658        | G196E        | T        | B         | D        | D        | D        | D        | T        | L        | D        | N        | D        |
| rs888003863        | G196R        | T        | PD        | D        | D        | D        | D        | D        | L        | D        | N        | D        |
| rs1272995596       | P195R        | T        | B         | D        | N        | D        | D        | T        | H        | N        | D, N     | D        |
| rs767083081        | L193H        | T        | B         | D        | N        | D        | D        | T        | M        | N        | N        | D        |
| rs1057521456       | S192N        | T        | B         | D        | D        | D        | D        | D        | M        | D        | N        | D        |
| rs1246778030       | S192G        | T        | B         | D        | D        | D        | D        | D        | L        | D        | N        | D        |
| rs767265448        | G190E        | T        | B         | D        | N        | D        | D        | D        | L        | N, D     | N        | N        |

|                     |              |          |           |          |          |          |          |          |          |          |          |          |
|---------------------|--------------|----------|-----------|----------|----------|----------|----------|----------|----------|----------|----------|----------|
| rs752944142         | G184E        | D        | PD        | D        | D        | D        | D        | D        | H        | D        | D        | D        |
| <b>rs1163901568</b> | <b>A183D</b> | <b>D</b> | <b>PD</b> | <b>D</b> | <b>D</b> | <b>D</b> | <b>D</b> | <b>D</b> | <b>H</b> | <b>D</b> | <b>D</b> | <b>D</b> |
| rs1415459561        | A183S        | D        | PD        | D        | D        | D        | D        | D        | H        | D        | D        | D        |
| rs1421855638        | I180T        | D        | PD        | D        | D        | D        | D        | D        | H        | D        | D        | D        |
| rs121908727         | A179D        | D        | PD        | D        | D        | D        | D        | D        | H        | D        | D        | D        |
| rs779346543         | V178A        | D        | PD        | D        | D        | D        | D        | D        | M        | D        | D        | D        |
| rs746363067         | V178L        | T        | PD        | D        | D        | D        | D        | D        | M        | D        | D        | D        |
| rs121908719         | V177M        | D        | PD        | D        | D        | D        | D        | D        | H        | D        | D        | D        |
| rs770456596         | Y172H        | D        | PSD       | D        | D        | D        | D        | D        | L        | D        | D        | D        |
| rs1042360           | K171N        | D        | PSD       | D        | D        | D        | D        | D        | M        | D        | D        | D        |
| rs371134570         | K170E        | T        | B         | D        | D        | D        | D        | D        | M        | D        | N        | D        |
| rs1203163011        | E167D        | T        | B         | D        | D        | D        | D        | D        | M        | D        | N        | D        |
| rs372671189         | E167G        | D        | PSD       | D        | D        | D        | D        | D        | M        | D        | D        | D        |
| rs1028999099        | V165M        | T        | PSD       | D        | D        | D        | D        | D        | L        | D        | N        | D        |
| rs1414736322        | S162C        | T        | PD        | D        | D        | D        | D        | D        | M        | D        | D        | D        |
| rs1479281280        | P159S        | T        | PD        | D        | D        | D        | D        | D        | M        | D        | D        | D        |
| rs867115027         | Q158H        | T        | B         | D        | D        | D        | D        | D        | L        | D        | N        | D        |
| rs121908722         | R156P        | D        | PD        | D        | D        | D        | D        | D        | H        | D        | D        | D        |
| rs121908722         | R156H        | D        | PSD       | D        | D        | D        | D        | D        | H        | A        | D        | D        |
| rs121908735         | R156C        | D        | PSD       | D        | D        | D        | D        | D        | H        | A        | D        | D        |
| rs28930971          | R156C        | D        | PSD       | D        | D        | D        | D        | D        | H        | A        | D        | D        |
| <b>rs371028908</b>  | <b>C153F</b> | <b>D</b> | <b>PD</b> | <b>D</b> | <b>D</b> | <b>D</b> | <b>D</b> | <b>D</b> | <b>H</b> | <b>D</b> | <b>D</b> | <b>D</b> |
| rs121908728         | L152V        | D        | PD        | D        | D        | D        | D        | D        | M        | D        | D        | D        |
| rs121908728         | L152M        | D        | PD        | D        | D        | D        | D        | D        | H        | A        | N        | D        |
| rs28930972          | L152V        | D        | PD        | D        | D        | D        | D        | D        | M        | D        | D        | D        |
| rs28930972          | L152M        | D        | PD        | D        | D        | D        | D        | D        | H        | A        | N        | D        |
| rs990121469         | I151T        | D        | PD        | D        | D        | D        | D        | D        | H        | D        | D        | D        |
| rs121908737         | R149Q        | D        | PD        | D        | D        | D        | D        | D        | M        | A        | D        | D        |
| rs121908733         | R149W        | D        | PD        | D        | D        | D        | D        | D        | H        | D        | D        | D        |
| rs121908733         | R149G        | D        | PD        | D        | D        | D        | D        | D        | L        | D        | D        | D        |
| rs1206634144        | A148S        | D        | PSD       | D        | N        | D        | D        | D        | M        | D        | N        | D        |
| rs551821715         | G145E        | T        | B         | D        | N        | D        | D        | D        | L        | N        | D        | N        |
| rs868364372         | D143Y        | D        | PD        | D        | D        | D        | D        | D        | M        | D        | D        | D        |
| rs61732239          | R142P        | D)       | PSD       | D        | N        | D        | D        | D        | H        | D        | D        | D        |
| rs61732239          | R142Q        | T        | B         | D        | N        | -        | D        | T        | L        | D        | N        | D        |
| rs1199690825        | E141K        | D        | PSD       | D        | D        | D        | D        | D        | M        | D        | N        | D        |
| rs121908732         | G140A        | D        | PD        | D        | D        | D        | D        | D        | M        | D        | D        | D        |
| <b>rs121908732</b>  | <b>G140E</b> | <b>D</b> | <b>PD</b> | <b>D</b> | <b>D</b> | <b>D</b> | <b>D</b> | <b>D</b> | <b>H</b> | <b>D</b> | <b>D</b> | <b>D</b> |
| rs746917604         | G140R        | D        | PD        | D        | D        | D        | D        | D        | H        | D        | D        | D        |
| rs1413219982        | E139K        | T        | B         | D        | D        | T        | D        | D        | L        | D        | N        | D        |
| rs1460593121        | Q138R        | T        | B         | D        | N        | T        | D        | T        | N        | D        | N        | D        |
| rs1327639803        | G134D        | T        | PSD       | D        | N        | D        | D        | T        | N        | N        | N        | N        |
| rs121908731         | V129L        | D        | PRD       | D        | D        | D        | D        | D        | H        | D        | D        | D        |
| rs121908731         | V129M        | D        | PD        | D        | D        | D        | D        | D        | H        | D        | D        | D        |
| rs773557479         | E128Q        | T        | B         | D        | D        | D        | D        | D        | M        | D        | N        | D        |

|              |       |   |     |   |   |   |   |   |   |   |      |   |
|--------------|-------|---|-----|---|---|---|---|---|---|---|------|---|
| rs773557479  | E128K | D | B   | D | D | D | D | D | M | D | D    | D |
| rs7344760    | D127E | T | B   | D | D | D | D | T | L | D | N    | N |
| rs1210466003 | D127N | D | PSD | D | D | D | D | D | M | D | N    | D |
| rs1233957241 | P126Q | D | PD  | D | D | D | D | D | M | D | D    | D |
| rs1436553912 | P126S | D | PD  | D | D | D | D | D | M | D | D    | D |
| rs536103858  | T125I | D | PD  | D | D | D | D | D | H | D | D    | D |
| rs536103858  | T125S | T | B   | D | D | D | D | D | N | D | D, N | D |
| rs1163253413 | L124I | T | B   | D | N | D | D | D | M | D | N    | N |
| rs1458135388 | D123H | D | PD  | D | D | D | D | D | M | D | D    | D |
| rs748035221  | E121V | D | B   | D | D | D | D | D | M | D | D    | D |
| rs748035221  | E121G | T | B   | D | D | D | D | D | M | D | D    | D |
| rs773612521  | Q119K | T | B   | D | D | D | D | D | - | D | N    | D |
| rs1304346114 | N118T | T | B   | D | N | D | D | D | - | N | N    | D |
| rs774510141  | P116H | D | PD  | D | D | D | D | D | - | D | D    | D |
| rs759962237  | P116S | T | PSD | D | D | D | D | D | - | D | D    | D |
| rs374166838  | P114Q | D | PD  | D | D | D | D | D | - | D | D    | D |
| rs1275500780 | E113K | T | B   | D | N | D | D | T | - | D | N    | N |
| rs998826246  | V112A | D | PSD | D | D | D | D | D | - | D | N    | D |
| rs1427855345 | V112L | T | B   | D | D | D | D | D | - | D | N    | D |
| rs543345924  | K111E | T | B   | D | D | D | D | T | - | N | N    | N |
| rs1483743360 | N109K | D | PD  | D | D | D | D | D | - | D | D    | D |
| rs764409246  | N109S | T | B   | D | N | D | D | D | - | D | D    | D |
| rs1163585601 | N109D | D | B   | D | D | D | D | D | - | D | D    | D |
| rs121908739  | L107P | D | PD  | D | D | D | D | D | - | A | D    | D |
| rs267606635  | L106V | D | PSD | D | D | D | D | D | - | D | N    | D |
| rs201522960  | H105Y | D | PD  | D | D | D | D | D | - | D | D    | D |
| rs1452483770 | P104L | D | PD  | D | D | D | D | D | - | D | D    | D |
| rs1452483770 | P104R | D | PD  | D | D | D | D | D | - | D | D    | D |
| rs1359688726 | Y102H | D | PD  | D | D | D | D | D | - | D | D    | D |
| rs28930970   | R101L | D | PD  | D | D | D | D | D | - | D | D    | D |
| rs28930970   | R101P | D | PD  | D | D | D | D | D | - | D | D    | D |
| rs28930970   | R101Q | D | PD  | D | D | D | D | D | - | D | D    | D |
| rs121908717  | R101W | D | PD  | D | D | D | D | D | - | A | D    | D |
| rs1386689344 | V100L | D | B   | D | D | D | D | D | - | D | N    | D |
| rs1437613842 | E99D  | D | PD  | D | D | D | D | D | - | D | D    | D |
| rs781241465  | V98M  | D | PSD | D | D | D | D | D | - | D | N    | D |
| rs267606634  | Y97F  | D | PD  | D | D | D | D | D | - | D | D    | D |
| rs267606634  | Y97C  | D | PD  | D | D | D | D | D | - | D | D    | D |
| rs1316605272 | V96M  | D | PSD | D | D | D | D | D | M | D | N    | D |
| rs145963969  | V95M  | D | PD  | D | D | D | D | D | H | D | D    | D |
| rs1160387427 | E93D  | D | B   | D | N | D | D | T | L | D | N    | D |
| rs1391023076 | A91T  | D | PD  | D | D | D | D | D | H | D | D    | D |
| rs1344927471 | E88A  | D | PD  | D | D | D | D | D | M | D | D    | D |
| rs778994749  | V87A  | D | PSD | D | D | D | D | D | M | D | N    | D |
| rs772021681  | Y84C  | D | PD  | D | D | D | D | D | H | D | D    | D |

|                     |             |          |           |          |          |          |          |          |          |          |          |          |
|---------------------|-------------|----------|-----------|----------|----------|----------|----------|----------|----------|----------|----------|----------|
| rs121908726         | A83G        | D        | PD        | D        | D        | D        | D        | D        | H        | D        | D        | D        |
| rs121908726         | A83D        | D        | PD        | D        | D        | D        | D        | D        | H        | D        | D        | D        |
| rs776103734         | A83T        | D        | PSD       | D        | D        | D        | D        | D        | M        | D        | D        | D        |
| rs1192450607        | I82N        | D        | PD        | D        | D        | D        | D        | D        | H        | D        | D        | D        |
| rs1425739099        | R81M        | D        | PD        | D        | D        | D        | D        | D        | H        | D        | D        | D        |
| rs11555566          | K80R        | T        | B         | D        | N        | -        | T        | T        | N        | D        | N        | D        |
| rs1445758422        | A78T        | D        | PD        | D        | D        | D        | D        | D        | M        | D        | D        | D        |
| rs374983783         | R76Q        | D        | PD        | D        | D        | D        | D        | D        | M        | D        | D        | D        |
| rs121908736         | R76W        | D        | PD        | D        | D        | D        | D        | D        | H        | A        | D        | D        |
| rs747528590         | A73V        | T        | B         | D        | N        | D        | D        | D        | L        | D        | N        | D        |
| rs921477673         | A73T        | D        | B         | D        | D        | D        | D        | D        | M        | D        | N        | D        |
| rs148785262         | I72F        | D        | PSD       | D        | D        | D        | D        | D        | M        | D        | D        | D        |
| rs148785262         | I72V        | T        | B         | D        | N        | D        | D        | D        | L        | D        | N        | D        |
| rs762213530         | A71V        | T        | B         | D        | N        | D        | T        | T        | N        | N        | N        | N        |
| rs968895664         | P70S        | T        | PSD       | D        | D        | D        | D        | D        | L        | D        | D        | D        |
| rs752086551         | F61L        | T        | PD        | D        | D        | D        | D        | D        | M        | D        | D        | D        |
| rs760262095         | D60G        | T        | B         | D        | N        | D        | D        | T        | N        | N        | N        | N        |
| rs760262095         | D60A        | T        | B         | D        | N        | D        | D        | T        | N        | N        | N        | N        |
| rs77588173          | P55L        | D        | B         | D        | D        | D        | D        | D        | M        | D        | D        | D        |
| rs750682305         | K54R        | T        | B         | D        | N        | D        | D        | D        | L        | N        | N        | D        |
| rs1294381082        | D53N        | T        | B         | D        | N        | D        | D        | D        | L        | N        | N        | D        |
| rs934757654         | M52K        | T        | B         | D        | D        | D        | D        | D        | L        | D        | N        | D        |
| rs1057460440        | I50T        | D        | PD        | D        | D        | D        | D        | D        | M        | D        | D        | D        |
| rs1306348962        | V49I        | T        | B         | D        | N        | D        | D        | T        | N        | N        | N        | N        |
| rs1276626543        | N48S        | T        | B         | D        | N        | D        | D        | T        | N        | N        | N        | N        |
| rs1363563144        | G45E        | T        | B         | D        | N        | D        | D        | T        | N        | N        | N        | N        |
| rs780318972         | T42R        | D        | PSD       | D        | D        | D        | D        | D        | M        | D        | D        | D        |
| rs199961890         | L38F        | T        | PD        | D        | D        | D        | D        | D        | H        | D        | D        | D        |
| rs151336936         | A37V        | T        | B         | D        | N        | D        | D        | T        | L        | N        | N        | N        |
| rs1044335093        | A37T        | T        | B         | D        | N        | D        | D        | T        | N        | N        | N        | N        |
| rs748611869         | I36M        | D        | B         | D        | D        | D        | D        | D        | M        | D        | N        | D        |
| rs770213537         | I36T        | D        | PSD       | D        | D        | D        | D        | D        | M        | D        | D        | D        |
| rs1431003280        | I36L        | T        | B         | D        | D        | D        | D        | D        | L        | D        | N        | D        |
| rs376909062         | G35R        | D        | PSD       | D        | D        | D        | D        | D        | M        | D        | D        | D        |
| rs1251027847        | R34T        | D        | PD        | D        | D        | D        | D        | D        | M        | D        | D        | D        |
| rs773388108         | R33K        | T        | B         | D        | N        | D        | D        | T        | N        | D        | N        | N        |
| rs1356820014        | R32K        | T        | B         | D        | N        | D        | T        | T        | N        | N        | N        | N        |
| rs759080719         | Y30C        | D        | PD        | D        | N        | D        | D        | D        | L        | N        | N        | D        |
| rs775324175         | Y30H        | T        | PD        | D        | N        | D        | D        | D        | L        | N        | N        | D        |
| rs746622099         | Y29C        | D        | PSD       | D        | D        | D        | D        | D        | M        | D        | D        | D        |
| rs199886437         | L28V        | T        | B         | D        | D        | D        | D        | D        | L        | D        | N        | D        |
| rs1455312539        | I27T        | D        | PD        | D        | D        | D        | D        | D        | H        | D        | D        | D        |
| <b>rs1004808726</b> | <b>T26I</b> | <b>D</b> | <b>PD</b> | <b>D</b> | <b>D</b> | <b>D</b> | <b>D</b> | <b>D</b> | <b>H</b> | <b>D</b> | <b>D</b> | <b>D</b> |
| rs761815086         | P24T        | T        | B         | D        | D        | D        | D        | D        | M        | D        | N        | D        |
| rs1321058509        | I22F        | D        | B         | D        | D        | D        | D        | D        | M        | D        | D        | D        |

|                     |             |          |           |          |          |          |          |          |          |          |          |          |
|---------------------|-------------|----------|-----------|----------|----------|----------|----------|----------|----------|----------|----------|----------|
| rs765144557         | S21C        | D        | B         | D        | D        | D        | D        | D        | L        | D        | N        | D        |
| rs139350872         | S21A        | T        | B         | D        | N        | D        | D        | T        | N        | N        | N        | N        |
| rs121908724         | G20R        | D        | PD        | D        | D        | D        | D        | D        | H        | D        | D        | D        |
| rs762695968         | D19E        | D        | PD        | D        | D        | D        | D        | D        | M        | D        | D        | D        |
| <b>rs1454861940</b> | <b>D19N</b> | <b>D</b> | <b>PD</b> | <b>D</b> | <b>D</b> | <b>D</b> | <b>D</b> | <b>D</b> | <b>H</b> | <b>D</b> | <b>D</b> | <b>D</b> |
| <b>rs1379847464</b> | <b>H17Q</b> | <b>D</b> | <b>PD</b> | <b>D</b> | <b>D</b> | <b>D</b> | <b>D</b> | <b>D</b> | <b>H</b> | <b>D</b> | <b>D</b> | <b>D</b> |
| <b>rs1270198057</b> | <b>H17Y</b> | <b>D</b> | <b>PD</b> | <b>D</b> | <b>D</b> | <b>D</b> | <b>D</b> | <b>D</b> | <b>H</b> | <b>D</b> | <b>D</b> | <b>D</b> |
| rs1330122216        | V16A        | D        | B         | D        | D        | D        | D        | D        | M        | D        | D        | D        |
| rs1330122216        | V16D        | D        | PSD       | D        | D        | D        | D        | D        | L        | D        | D        | D        |
| <b>rs1209280928</b> | <b>H15P</b> | <b>D</b> | <b>PD</b> | <b>D</b> | <b>D</b> | <b>D</b> | <b>D</b> | <b>D</b> | <b>H</b> | <b>D</b> | <b>D</b> | <b>D</b> |
| <b>rs121908725</b>  | <b>H15D</b> | <b>D</b> | <b>PD</b> | <b>D</b> | <b>D</b> | <b>D</b> | <b>D</b> | <b>D</b> | <b>H</b> | <b>D</b> | <b>D</b> | <b>D</b> |
| rs73598374          | D8Y         | D        | PSD       | D        | N        | D        | D        | D        | L        | D        | N        | D        |
| rs73598374          | D8H         | D        | PSD       | D        | N        | D        | D        | D        | L        | D        | N        | D        |
| rs73598374          | D8N         | T        | B         | D        | N        | -        | T        | T        | N        | N        | N        | N        |
| rs956908942         | A6S         | T        | B         | D        | N        | D        | D        | D        | N        | D        | N        | D        |
| rs956908942         | A6P         | T        | B         | D        | N        | D        | D        | D        | N        | D        | N        | D        |
| rs1464312281        | P5S         | D        | B         | D        | N        | D        | D        | D        | N        | D        | N        | D        |

D: Deleterious; H: High functional; PD: Probably damaging; PSD: Possibly damaging;

T: Tolerated; B: Benign; N: Neutral; M: Medium; L: Low
